# Supplementary material for: Altered Bone and Mineral Metabolism in Patients Receiving Imatinib Mesylate
Source: Atypon-hosted journal article supplement (doi:10.1056/nejmoa051140), 2006-05-10
Supplement: nejm_berman_2006sa1.pdf [file nejm_berman_2006sa1.pdf]

## Supplementary Appendix

This appendix has been provided by the authors to give readers additional information about their work.

Supplement to: Berman E, Nicolaidis M, Maki RG, et al. Altered bone and mineral metabolism in patients receiving imatinib mesylate. *N Engl J Med* 2006;354:2006-13.

Appendix Table 1A: Metabolic Evaluation in Patients with Low Serum PO4

| UPIN          | Disease | Age/<br>Sex | Imatinib<br>Dose | Serum<br>Phosphate<br>(2.5-4.2<br>mg/dl) | Serum Calcium/<br>Ionized Calcium<br>(8.5-10.5 mg/dl) /<br>(4.8-5.2 mg/dl) | Parathyroid<br>Hormone<br>(10-65 pg/ml) | Serum<br>Magnesium<br>(1.4-2.2<br>mEq/l) | 25-<br>Hydroxy-<br>vitamin D<br>(9-37 ng/ml) | 1,25-<br>Dihydroxy-<br>vitamin D<br>(19-67 ng/ml) | Urinary<br>Fractional<br>excretion of<br>Phosphate<br>(< 5%) | Spot<br>Urinary<br>Calcium<br>(mg/dl) | BUN/<br>Creatinine<br>(6-20 mg/dl) /<br>(0.6-1.3 mg/dl) | White<br>blood cell<br>count<br>(4-11<br>K/mcl) | Serum N-<br>Telopeptide of<br>Collagen Cross-<br>links (5.5-19.5<br>nMBCE) | Bone<br>Alkaline<br>Phosphatase<br>(15-41 U/L) | Serum<br>Osteocalcin<br>(3.1-13.7<br>ng/ml) |
|---------------|---------|-------------|------------------|------------------------------------------|----------------------------------------------------------------------------|-----------------------------------------|------------------------------------------|----------------------------------------------|---------------------------------------------------|--------------------------------------------------------------|---------------------------------------|---------------------------------------------------------|-------------------------------------------------|----------------------------------------------------------------------------|------------------------------------------------|---------------------------------------------|
| 1             | CML     | 60 M        | 600              | 2.0                                      | 8.7/-                                                                      | 53                                      | 1.7                                      | 9.1                                          | 100                                               | 21                                                           | 7.1                                   | 17/1.5                                                  | 3.4                                             | -                                                                          | -                                              | -                                           |
| 2             | CML     | 56 M        | 600              | 1.7                                      | 8.6/-                                                                      | 97                                      | 1.6                                      | -                                            | -                                                 | 24                                                           | -                                     | 17/1.3                                                  | 4.1                                             | -                                                                          | -                                              | -                                           |
| 3             | CML     | 56 M        | 400              | 2.3                                      | 9.4/4.7                                                                    | 68                                      | -                                        | 29                                           | 60                                                | 45                                                           | 5.8                                   | 10/1.1                                                  | 5.9                                             | -                                                                          | -                                              | -                                           |
| 4             | CML     | 56 M        | 400              | 1.9                                      | 9.5/4.8                                                                    | 84                                      | 1.7                                      | 39.6                                         | 103                                               | 25                                                           | <2                                    | 16/1.0                                                  | 6.4                                             | 7.1                                                                        | 18                                             | 3.7                                         |
| 5             | CML     | 40 F        | 800              | 1.8                                      | 8.9/5.0                                                                    | 85                                      | 1.5                                      | 3.7                                          | 58                                                | 17                                                           | 4                                     | 8/1.2                                                   | 8.1                                             | 6.2                                                                        | 15                                             | NMA                                         |
| 6             | GIST    | 46 M        | 600              | 2.1                                      | 9.3/-                                                                      | 83                                      | 1.7                                      | -                                            | -                                                 | 23                                                           | 7.1                                   | 8/1.1                                                   | 8.0                                             | -                                                                          | -                                              | -                                           |
| 7             | CML     | 49 M        | 600              | 1.7                                      | 8.7/4.9                                                                    | 57                                      | 1.9                                      | 19                                           | 13                                                | 17                                                           | <2                                    | 15/1.4                                                  | 5.9                                             | 5.6                                                                        | 17                                             | NMA                                         |
| 8             | GIST    | 42 M        | 400              | 1.0                                      | 8.1/4.5                                                                    | 136                                     | 1.8                                      | 6.7                                          | 13                                                | 38                                                           | <2                                    | 4/9                                                     | 7.0                                             | 10.1                                                                       | 53                                             | NMA                                         |
| 9             | CML     | 36 M        | 400              | 2.3                                      | 9.2/4.4                                                                    | 81                                      | 1.7                                      | 33                                           | 66                                                | 10                                                           | 32                                    | 14/1.3                                                  | 3.8                                             | 13.4                                                                       | 17                                             | NMA                                         |
| 10            | CML     | 32 F        | 400              | 2.1                                      | 8.9/-                                                                      | 41                                      | 1.7                                      | 11                                           | 40                                                | 17                                                           | 23                                    | 9/0.7                                                   | 3.7                                             | 5.8                                                                        | 15                                             | 2.6                                         |
| 11            | GIST    | 50/M        | 600              | 2.4                                      | 9.3/-                                                                      | 101                                     | 1.9                                      | 97.3                                         | 87                                                | 24                                                           | -                                     | 25/1.6                                                  | 5.8                                             | 12.4                                                                       | 23                                             | 2.6                                         |
| 12            | GIST    | 62/F        | 400              | 2.1                                      | 8.6/-                                                                      | 73                                      | 1.6                                      | 17.2                                         | 46                                                | 4                                                            | 16.3                                  | 15/1.1                                                  | 5.0                                             | 3                                                                          | 25                                             | 1.1                                         |
| 13            | GIST    | 58/M        | 700              | 2.2                                      | 8.7/-                                                                      | 114                                     | 1.8                                      | 30.5                                         | 70                                                | 27                                                           | 8.9                                   | 14/1.1                                                  | 5.4                                             | 6.6                                                                        | 25                                             | 2.3                                         |
| 14            | GIST    | 55/M        | 800              | 1.6                                      | 8.7/-                                                                      | 100                                     | 1.5                                      | 14.4                                         | 47                                                | 31                                                           | 4.0                                   | 14/1.6                                                  | 5.7                                             | 9.5                                                                        | 21                                             | 2.4                                         |
| 15            | GIST    | 27/F        | 600              | 2.2                                      | 8.5/4.5                                                                    | 43                                      | 1.7                                      | 27.3                                         | 71                                                | 6                                                            | <2                                    | 8/9                                                     | -                                               | 12.6                                                                       | 16.1                                           | 4.1                                         |
| 16            | GIST    | 50/M        | 600              | 1.9                                      | 8.7/4.9                                                                    | 139                                     | 1.6                                      | 18.6                                         | 49                                                | 30                                                           | 4.6                                   | 16/1.3                                                  | 3.5                                             | 10                                                                         | 32.7                                           | 6.7                                         |
| <b>Median</b> |         | <b>50</b>   | <b>600</b>       | <b>2.0</b>                               | <b>8.7/4.7</b>                                                             | <b>84</b>                               | <b>1.7</b>                               | <b>18.8</b>                                  | <b>59</b>                                         | <b>24%</b>                                                   | <b>5.2</b>                            | <b>14/1.2</b>                                           | <b>5.7</b>                                      | <b>8.3</b>                                                                 | <b>20</b>                                      | <b>2.3</b>                                  |

**Appendix Table 1B: Metabolic Evaluation in Patients with Normal Serum PO4**

| UPIN          | Disease | Age/<br>Sex | Imatinib<br>Dose | Serum<br>Phosphate<br>(2.5-4.2<br>mg/dl) | Serum calcium/<br>ionized calcium<br>(8.5-10.5 mg/dl) /<br>(4.8-5.2 mg/dl) | Parathyroid<br>hormone<br>(10-65 pg/ml) | Serum<br>Magnesium<br>(1.4-2.2<br>mEq/l) | 25-<br>Hydroxy-<br>vitamin D<br>(9-37 ng/ml) | 1,25-<br>Dihydroxy-<br>vitamin D<br>(19-67 ng/ml) | Urinary<br>Fractional<br>excretion of<br>phosphate | Spot<br>Urinary<br>Calcium<br>(mg/dl) | BUN/<br>Creatinine<br>(6-20 mg/dl) /<br>(0.6-1.3 mg/dl) | White<br>blood cell<br>count<br>(4-11<br>K/mcl) | Serum N-<br>Telopeptide of<br>Collagen Cross-<br>links (5.5-19.5<br>nMBCE) | Bone<br>Alkaline<br>Phosphatase<br>(15-41 U/L) | Serum<br>Osteocalcin<br>(3.1-13.7<br>ng/ml) |
|---------------|---------|-------------|------------------|------------------------------------------|----------------------------------------------------------------------------|-----------------------------------------|------------------------------------------|----------------------------------------------|---------------------------------------------------|----------------------------------------------------|---------------------------------------|---------------------------------------------------------|-------------------------------------------------|----------------------------------------------------------------------------|------------------------------------------------|---------------------------------------------|
| 1             | GIST    | 75/F        | 300              | 3.1                                      | 9.6/-                                                                      | 32                                      | 1.8                                      | 27.4                                         | 66                                                | 28                                                 | 8.2                                   | 13/1.1                                                  | 6.4                                             | 8.5                                                                        | 24                                             | 3.5                                         |
| 2             | GIST    | 57/M        | 800              | 4.0                                      | 9.2/-                                                                      | 60                                      | 1.8                                      | 38.8                                         | 64                                                | 26                                                 | 3.7                                   | 11/1.4                                                  | 3.3                                             | 5.3                                                                        | 19.                                            | 5.2                                         |
| 3             | GIST    | 70/M        | 400              | 2.7                                      | 9.4/-                                                                      | 53                                      | 1.4                                      | 28.9                                         | 51                                                | 2                                                  | <2                                    | 24/1.7                                                  | 7.9                                             | 7.2                                                                        | 24                                             | 6.7                                         |
| 4             | GIST    | 67/M        | 100              | 2.8                                      | 8.7/4.5                                                                    | 27                                      | 1.6                                      | 16.5                                         | 31                                                | 28                                                 | 6.3                                   | 21/1.1                                                  | 5.7                                             | 16                                                                         | 33                                             | 3.0                                         |
| 5             | GIST    | 58/M        | 300              | 2.9                                      | 9.1/4.8                                                                    | 31                                      | 1.9                                      | 24.6                                         | 68                                                | 31                                                 | 9.1                                   | 16/8                                                    | -                                               | 13.9                                                                       | 36                                             | 10.0                                        |
| 6             | GIST    | 69/M        | 400              | 3.4                                      | 9.5/4.7                                                                    | 52                                      | 1.7                                      | 40.2                                         | 53                                                | 31                                                 | 4.2                                   | 15/1.1                                                  | 5.0                                             | 12                                                                         | 16                                             | 1.9                                         |
| 7             | GIST    | 41/F        | 400              | 3.2                                      | 8.9/4.6                                                                    | 55                                      | 1.7                                      | 33                                           | 61                                                | 23                                                 | 11.3                                  | 10/1.0                                                  | 3.7                                             | 9.4                                                                        | 13                                             | 2.2                                         |
| 8             | GIST    | 48/M        | 300              | 3.4                                      | 9.1/5/1                                                                    | 29                                      | 1.7                                      | 28.7                                         | 71                                                | 13                                                 | 3.9                                   | 15/9                                                    | 5.3                                             | 10.8                                                                       | 17                                             | 1.4                                         |
| <b>Median</b> |         | <b>63</b>   | <b>350</b>       | <b>3.2</b>                               | <b>9.2/4.7</b>                                                             | <b>42</b>                               | <b>1.7</b>                               | <b>28.8</b>                                  | <b>63</b>                                         | <b>27%</b>                                         | <b>5.3</b>                            | <b>15/1.1</b>                                           | <b>5.3</b>                                      | <b>10.1</b>                                                                | <b>22</b>                                      | <b>3.3</b>                                  |

Appendix Table 1C: Metabolic Evaluation in Normal Adult Volunteers Without Cancer

| Control       | Age/sex     | Serum Phosphate (2.5-4.2 mg/dl) | Serum Calcium/Ionized Calcium (8.5-10.5 mg/dl)/4.8-5.2 mg/dl) | Parathyroid Hormone (10-65pg/ml) | Serum Magnesium (1.4-2.2 mEq/l) | 25-Hydroxy-vitamin D (9-37 ng/ml) | 1,25 Dihydroxy-vitamin D (19-67 ng/ml) | Urinary Fractional Excretion of Phosphate (%) | Spot Urinary Calcium (mg/dl) | BUN/Creatinine (6-20 mg/dl)/0.6-1.3 mg/dl) | Serum N-Telopeptide of Collagen Cross-links (5.5-19/5 nMBCE) | Bone Alkaline Phosphatase (15-41 U/L) | Serum Osteocalcin (3.1-13.7 ng/ml) |
|---------------|-------------|---------------------------------|---------------------------------------------------------------|----------------------------------|---------------------------------|-----------------------------------|----------------------------------------|-----------------------------------------------|------------------------------|--------------------------------------------|--------------------------------------------------------------|---------------------------------------|------------------------------------|
| 1             | 65          | 3.6                             | 9.4/4.6                                                       | 57                               | 1.9                             | 28.8                              | 67                                     | 24                                            | 10                           | 19/1.3                                     | 17.3                                                         | 23                                    | 10                                 |
| 2             | 39          | 3.3                             | 9.2/4.7                                                       | 55                               | 1.8                             | 24.5                              | 70                                     | 17                                            | 12                           | 20/1.0                                     | 14.9                                                         | 17                                    | 5.7                                |
| 3             | 46          | 3.3                             | 9.7/4.9                                                       | 31                               | 2.0                             | 21.9                              | 71                                     | 17                                            | 10                           | 16/1.2                                     | 15.2                                                         | 36                                    | 11.7                               |
| 4             | 33          | 3.2                             | 9.5/4.6                                                       | 18                               | 2.0                             | 15.1                              | 66                                     | 15                                            | 3                            | 10/0.9                                     | 12.4                                                         | 29                                    | 8.1                                |
| 5             | 40          | 4.1                             | 9.3/4.7                                                       | 52                               | 1.8                             | 41.5                              | 63                                     | 23                                            | 7                            | 15/1.1                                     | 18.1                                                         | 29                                    | 8.3                                |
| 6             | 49          | 3.7                             | 9.6/4.6                                                       | 24                               | 1.9                             | 12.0                              | 62                                     | 14                                            | 27                           | 23/1.6                                     | 17.7                                                         | 20                                    | 4.7                                |
| 7             | 37          | 4.1                             | 9.5/4.8                                                       | 44                               | 1.8                             | 24.3                              | 49                                     | 16                                            | 4                            | 17/1.1                                     | 19.4                                                         | 25                                    | 13.4                               |
| 8             | 34          | 3.6                             | 10.1/4.9                                                      | 27                               | 1.8                             | 36.2                              | 29                                     | 20                                            | 8                            | 17/1.0                                     | 15.6                                                         | 24                                    | 15.6                               |
| 9             | 40          | 3.3                             | 9.5/4.7                                                       | 31                               | 1.8                             | 18.5                              | 48                                     | 9                                             | 5.3                          | 19/1.2                                     | 6.1                                                          | 17                                    | 5.5                                |
| 10            | 54          | 4.1                             | 9.6/4.6                                                       | 50                               | 1.9                             | 31.7                              | 105                                    | 21                                            | 26                           | 19/1.1                                     | 18                                                           | 48                                    | 23.4                               |
| 11            | 48          | 3.1                             | 9.3/4.5                                                       | 44                               | 1.8                             | 18.2                              | 36                                     | 15                                            | 13                           | 18/1.4                                     | 13.6                                                         | 24                                    | 7.2                                |
| 12            | 24          | 2.8                             | 8.7/4.5                                                       | 56                               | 1.6                             | 56.9                              | 103                                    | 12                                            | 5                            | 15/1.0                                     | 9.1                                                          | 28                                    | <1                                 |
| 13            | 34          | 3.6                             | 9.2/4.8                                                       | 41                               | 1.7                             | 11.5                              | 43                                     | 9                                             | 14                           | 15/1.2                                     | 9.8                                                          | 24                                    | 12.3                               |
| 14            | 34          | 3.2                             | 9.2/4.7                                                       | 15                               | 1.5                             | 37.7                              | 44                                     | 8                                             | 4.9                          | 13/0.9                                     | 12.9                                                         | 27                                    | 8.5                                |
| <b>Median</b> | <b>39.5</b> | <b>3.45</b>                     | <b>9.4/4.7</b>                                                | <b>43</b>                        | <b>1.8</b>                      | <b>24.4</b>                       | <b>63</b>                              | <b>16</b>                                     | <b>8.8</b>                   | <b>17/1.1</b>                              | <b>15.1</b>                                                  | <b>25</b>                             | <b>8.4</b>                         |
